1 **MAJOR AETIOLOGIES OF MALE INFERTILITY AMONG COUPLES**  
2 **ATTENDING FERTILITY CLINICS IN OSUN STATE, NIGERIA: FINDINGS**  
3 **FROM A MIXED METHOD STUDY**

4 <sup>a</sup>Kehinde Awodele, <sup>b</sup>Sunday Charles Adeyemo, <sup>c</sup>Eniola Dorcas Olabode, <sup>d</sup>Adeniyi  
5 Olaonipekun Fasanu, <sup>e</sup>Akintunde Rasaq Akindele, <sup>d</sup>Olusegun Adegboyega Afolabi  
6 <sup>e</sup>Olufunso Abidemi Olagunju, <sup>f</sup>Olusegun Oyerinde, <sup>g</sup>Lanre Olaitan

7 <sup>a</sup>Obstetrics and Gynecology Department, Uniosun Teaching Hospital, Osogbo, Nigeria.

8 [Kawodele@uth-osogbo.org.ng](mailto:Kawodele@uth-osogbo.org.ng)

9 <sup>b</sup>Institut Superieur de Sante, Niamey, Niger Republic

10 [charlespatho@gmail.com](mailto:charlespatho@gmail.com)

11 <sup>c</sup>Department of Community Health, Obafemi Awolowo University, Ile-Ife, Nigeria

12 [oluwafemieniola.ed@gmail.com](mailto:oluwafemieniola.ed@gmail.com)

13 <sup>d</sup>Department of Obstetrics and Gynecology, Osun State University, Osogbo, Nigeria.

14 [adeniyi.fasanu@uniosun.edu.ng](mailto:adeniyi.fasanu@uniosun.edu.ng)

15 [drakindele@yahoo.com](mailto:drakindele@yahoo.com)

16 [adegboyega.afolabi@uniosun.edu.ng](mailto:adegboyega.afolabi@uniosun.edu.ng)

17 <sup>e</sup>Department of public health, University of Ilorin.

18 [Lanreolive@gmail.com](mailto:Lanreolive@gmail.com)

19 <sup>f</sup>Department of Pediatrics, Osun State University, Osogbo, Osun State, Nigeria

20 [funso.olagunju@uniosun.edu.ng](mailto:funso.olagunju@uniosun.edu.ng)

21 <sup>g</sup>Faculty of basic medicine science Adeleke University, Ede

22 [olufemi.oyerinde@adelekeuniversity.edu.ng](mailto:olufemi.oyerinde@adelekeuniversity.edu.ng)

23 **Corresponding author:**

24 Kehinde Awodele

25 +2348033992462, [Kawodele@uth-osogbo.org.ng](mailto:Kawodele@uth-osogbo.org.ng)

26

27

28

29

30

31

32

33

34 **Abstract**

35 Male infertility accounts for nearly half of the infertility cases globally. Seminal fluid  
36 analysis (SFA) is a critical diagnostic tool in the evaluation of male infertility. This study  
37 aimed to assess the implications of seminal fluid analysis on male infertility among patients  
38 attending fertility clinics in Osogbo, Nigeria.

39 The study employed mixed-method approach of both qualitative (Key informant interview)  
40 among 10 participants and quantitative method (cross-sectional survey) using pre-tested  
41 structured questionnaire among 305 respondents. The respondents in the cross-sectional  
42 survey were also made to undergo seminal fluid analysis. The data from the qualitative study  
43 was analysed using Atlas ti while data from the quantitative study were analysed using IBM  
44 Statistical Product for Service Solution (SPSS) version 27. 0. Descriptive statistics was  
45 carried out for all variables. The univariate, bivariate and multivariate analysis were done  
46 using  $p < 0.05$  as level of significance.

47 The seminal fluid analysis of the respondents revealed that 241 (79.0%) had Normal sperm  
48 count ( $>32$  million per ejaculation) while 64 (21.0%) had abnormal sperm count. Only 101  
49 (33.1%) had normal progressive motility ( $>32$  percent) while 204 (66.9%) had abnormal  
50 (Athenospermia) progressive motility. 195 (63.9%) were found to have abnormal  
51 morphology (Teratospermia i.e.,  $<4\%$ ). The qualitative analysis further analysed the  
52 implications of SFA parameters on infertile males and these were substantial, extending  
53 beyond physical health to encompass psychological, emotional, and social well-being.

54 The study concluded that lifestyle modifications and early diagnosis as well as prompt  
55 treatment of medical conditions can curb high prevalence abnormality of SFA, hence reduce  
56 male infertility in our environment. The study recommends that advocacy program, early  
57 screening and public health education will further reduce the burden of infertility among the  
58 female folks.

59 **Key words:** Male Infertility, Implications, Seminal fluid Analysis

60

61

62

63 **Introduction**

64 Seminal fluid plays a crucial role in the fertilisation process, providing a supportive  
65 environment for sperm transport, nourishment, and protection against the female reproductive  
66 tract's hostile conditions. [1] Seminal fluid analysis (SFA) is a critical diagnostic tool in the  
67 evaluation of male infertility. It involves the examination of various semen parameters, such  
68 as sperm concentration, motility, morphology, and seminal plasma composition, to assess a  
69 man's fertility potential. [2] Male infertility accounts for nearly half of the infertility cases  
70 globally. In Southwest Nigeria, there is limited research on the seminal fluid analysis and its  
71 implications on male infertility among patients attending fertility clinics. Investigating this  
72 relationship can help identify factors contributing to infertility in this region and inform the  
73 development of targeted interventions to improve reproductive outcomes for affected  
74 couples. Understanding the connection between SFA findings and male infertility could have  
75 significant implications for clinical practice, public health policies, and patient counselling.  
76 Therefore, this study aimed to assess the implications of seminal fluid analysis on male  
77 infertility among patients attending fertility clinics in Osogbo, Nigeria.

78 **Materials and Method**

79 The study employed mixed-method approach of both qualitative (Key informant interview)  
80 among 10 participants and quantitative method (cross-sectional survey) among 350  
81 respondents. The study population were male patients attending fertility centers in Osogbo,  
82 Osun State. Fisher's formula ( $n=z^2pq/d^2$ ) was used to determine the sample size. The  
83 respondents were selected using multistage sampling technique. 5 centers were randomly  
84 selected out of the major fertility centers in Osogbo. Proportional allocation was used to  
85 determine the number of respondents from each center. Male patients aged 18-50 were

86 randomly selected in each center. Data was collected from the respondents of the quantitative  
87 study using pre-tested questionnaire as well as seminal fluid analysis. After consent has been  
88 obtained, the semen of the respondents was collected under sterile conditions after an  
89 abstinence period of 2–7 days using sterilized universal bottles. This was carried out in a  
90 private room near the laboratory in order to reduce the exposure of the semen to fluctuations  
91 in temperature and to control the time between collection and analysis. The semen was then  
92 analysed in the laboratory for sperm count, motility and morphology of the semen. The data  
93 from the questionnaire were analysed using IBM Statistical Product for Service Solution  
94 (SPSS) version 27. Descriptive statistics was used for all variables. Bivariate and multivariate  
95 analysis were done at  $p < 0.05$  as level of significance. Data from the key informant interview  
96 was recorded, transcribed and analysed using Atlas ti.

## 97 **Results and Discussion**

### 98 **Results**

#### 99 **Quantitative study**

##### 100 **Sociodemographic characteristics**

101 All the respondents were married male attending the infertility clinic in Osogbo. More than  
102 half 204(58.3%) of the respondents were with the ages of 30-45years, while the majority, 333  
103 (95.4%) were Yoruba. 222 (63.6%) had tertiary level of education. More than half, 207  
104 (59.0%) were skilled workers.

##### 105 **Seminal fluid analysis of male patients attending fertility center in**

106 Majority of the respondents, 249 (71.0%) had Normal sperm count ( $>32$  million per  
107 ejaculation) while 101 (29.0%) had abnormal sperm count in different categories. (Figure 1)  
108 Only 116 (33.1%) had normal progressive motility ( $>32$  percent) while 234 (66.9%) had  
109 abnormal (Athenospermia) progressive motility. 224 (63.9%) were found to have abnormal

110 morphology (Teratospermia i.e., <4%). (Table 1) Overall, 321 (91.8%) of the respondents  
111 have at least one abnormality in the semen analysis.

## 112 **Qualitative study**

### 113 **Sociodemographic characteristics of participants**

114 The participants' ages range from 25 to 44 years old. Six participants were female, and four  
115 were male. Seven participants were married, three were single. The predominant ethnicity  
116 was Yoruba, with one participant being Nupe. Five participants were Christian and five  
117 were Muslim. Educational status varies, with three participants having tertiary education,  
118 two with HND, one with SSCE, and four with an unspecified level of education. The  
119 participant types include three wives, four nurses, and three doctors. (Table 2)

### 120 **Causes of male infertility**

121 Participants have different response what causes infertility. Majority of the response were  
122 directly or indirectly referring to the lifestyle such as smoking, alcohol consumption,  
123 having multiple sexual partners etc. as the cause of infertility, while some stated infertility  
124 is caused by medical conditions, genetics or childhood factor.

125 *“I think the lifestyle is one of the main causes, like smoking, taking alcohol, having  
126 multiple sexual partners which can predispose them to sexually transmitted infections” ....*

127 *NI. “I think um the causes are diabetes, hypertension as well as obesity there are also risk  
128 factors like smoking and alcoholism... and some other dangerous lifestyles like having  
129 multiple sexual partners” N2. “I would say maybe smoking and alcohol” ... N7. “It can  
130 cause by maybe disease” ... N5.*

131 *“Well, it could be due to infections. Like we were told that in childhood, especially maybe  
132 a male child that was infected with mumps. If the mumps is not well treated, it could lead to  
133 infertility in future. And, it could be due to sexually transmitted infections that are not well*

134 *treated” ... N4, .... This may be the one contracted during the bad habit of promiscuity by*  
135 *ether the male or female... and thereby causing infertility” .... N8*

136 *“Well, I think there are different causes of infertility: Ranging from genetics to lifestyle*  
137 *could affect the patient” ...N6. It can be genetically motivated or it medical related*  
138 *causes.... N10*

### 139 **Lifestyle as a cause of male infertility**

140 All the participants affirmed that lifestyle could cause infertility in male. Factors such as  
141 alcohol consumption, smoking, multiple sexual partners, and untreated infections were  
142 stated as the lifestyles causing male infertility.

143 *“Yes, I think lifestyle. like a male that is having so many sexual partners could lead to*  
144 *infections, and if it's not treated, it could lead to infertility” ... N4. “Yes, I think yes, social*  
145 *life is causing it. Social life that can bring a lot of infections and some infections can cause*  
146 *infertility in men” ... N5. “Smoking... Alcohol intake...N6, ... “yes like engagement in*  
147 *drinking of alcohol, smoking etc....N7. “Most of the times, this infertility is caused by*  
148 *lifestyle factors including smoking, alcohol consumption.... N10.*

### 149 **Medical illness causing male infertility**

150 While the majority of the participants affirmed that hypertension and diabetes may cause  
151 infertility, a few stated it can be caused by sexually transmitted infections.

152 *“I know of diabetes, hypertension, but I'm not sure I have heard obesity being a cause of*  
153 *male infertility...N5. ...Obesity...N2, I think especially sexually transmitted infections can*  
154 *cause it...N4. “Some underlying medical conditions such as diabetes, varicocele, that*  
155 *could also cause infertility” ...N7 “I really can't say” ...N1. I heard the infections from*  
156 *usually from extra-marital affairs causes it... N9.*

## 157 **Discussion**

158 This study assessed the major aetiology of infertility among couples attending fertility  
159 clinics in Osogbo, Osun State, Nigeria. More than half of the respondents were between the  
160 ages of 30 and 45 years. More than half of the respondents have tertiary as their highest  
161 educational attainment and the same proportion were skilled workers. This is similar to  
162 another study conducted among male partners attending infertility clinic in a Tertiary  
163 Nigerian Hospital where 50.2% were within the ages of 35-44 years.[3] but not in tandem  
164 with another study on SFA in west Ethiopia that reported more (45.8%) of their  
165 participants to be within 25-30 age bracket. [4]

166 Overall, this study findings revealed that about 9 out of 10 participants had at least one  
167 abnormality in their Seminal Fluid Analysis (SFA), which is similar to the findings of [3]  
168 where about four-fifth of the respondents were reported to have at least one abnormality in  
169 their SFA. Further analysis of the participants sperm count revealed 71.1% to have  
170 normozoospermia which is in tandem with [4] study on SFA analysis, only 3.0% had  
171 Azoospermia which is dissimilar to other study among the same study population that  
172 reported about half (47.5%) to have had Azoospermia. [3]

173 The findings of qualitative analysis in the study assessed the causes male infertility, the  
174 majority referred to lifestyle as the causes, while its evident some lifestyles like smoking,  
175 alcohol consumption, as well medical conditions as causes of male infertility This was  
176 supported by the study of [5]. This findings is also similar to the report of a qualitative  
177 study on male fertility.[6]

178 Male infertility according to the participants may cause psychological, emotional, and  
179 social distress, they stated that male infertility may cause by excessive drinking, having  
180 multiple sexual partners that may expose men to STIs and which may eventually cause

181 infertility. Also, men believe that once they can ejaculate or fathered a child before, they  
182 cannot be infertile. And their diagnosis of been infertile may lead to emotional and  
183 psychological issues, some may even attempt suicidal ideation. Virtually all the  
184 respondents believed that male infertility can be caused but medical conditions. However,  
185 some of the participants in the qualitative study, including a doctor believed that male  
186 infertility can be caused by spiritual force. This is in tandem with the submission made by  
187 [6] study on lifestyle causes of male infertility.

188

## 189 **Conclusions**

190 The findings indicate a prevalence of abnormal seminal fluid parameters (low sperm count,  
191 motility, and morphology) among the participants. Lifestyle choices were commonly cited  
192 as contributors to infertility, with participants highlighting the detrimental effects of habits  
193 such as smoking, STI and alcohol consumption on reproductive health. Additionally,  
194 lifestyle factors, including habitual smoking, STI and alcohol consumption, were  
195 recognized as potential predictors of abnormality in SFA and male infertility.

## 196 **Data availability**

197 The data for this study is available on reasonable request from the corresponding author.

198 “A preprint has previously been published [MEDRXIV/2024/311725]”

## 199 **Conflict of interest**

200 The authors know no conflict of interest for the study

## 201 **Funding**

202 The study was funded by the authors.



## 203 Acknowledgements

204 The authors wish to acknowledge the respondents who gave their consent to be part of this  
205 study as well as the head of the facility centres for their permission during the course of  
206 this study.

## 207 References

208 [1] Robertson, S. A., and Sharkey, D. J. (2016). Seminal fluid and fertility in women.  
209 *Fertility and Sterility*, 106(3), 511–519. <https://doi.org/10.1016/j.fertnstert.2016.07.1101>

210 [2] WHO. (2021a). WHO laboratory manual for the examination and processing of human  
211 semen. In *WHO laboratory manual for the examination and processing of human semen (5th*  
212 *ed.)* (5th ed.).

213 [3] Umar, A. ., Panti, A. ., Mbakwe, M., Ahmed, Y., Garba, J. ., & Nnadi, D. C. (2020). The  
214 Pattern of Seminal Fluid Analysis among Male Partners Attending an Infertility Clinic in a  
215 Nigerian Tertiary Health Institution. *Open Journal of Obstetrics and Gynecology*, 10, 957–  
216 967.

217 [4] Tilahun, T., Oljira, R., and Getahun, A. (2022). Pattern of semen analysis in male partners  
218 of infertile couples in Western Ethiopia: Retrospective cross-sectional study. *SAGE Open*  
219 *Medicine*, 10, 1–7. <https://doi.org/10.1177/20503121221088100>

220 [5] Durairajanayagam, D. (2018). Lifestyle causes of male infertility. *Arab Journal of*  
221 *Urology*, 16(1), 10–20. <https://doi.org/10.1016/j.aju.2017.12.004>

222 [6] Harlow, A. F., Zheng, A., Nordberg, J., Hatch, E. E., Ransbotham, S., and Wise, L. A.  
223 (2020). A qualitative study of factors influencing male participation in fertility research.  
224 *Reproductive Health*, 17(1), 1–14. <https://doi.org/10.1186/s12978-020-01046-y>

225

226

227

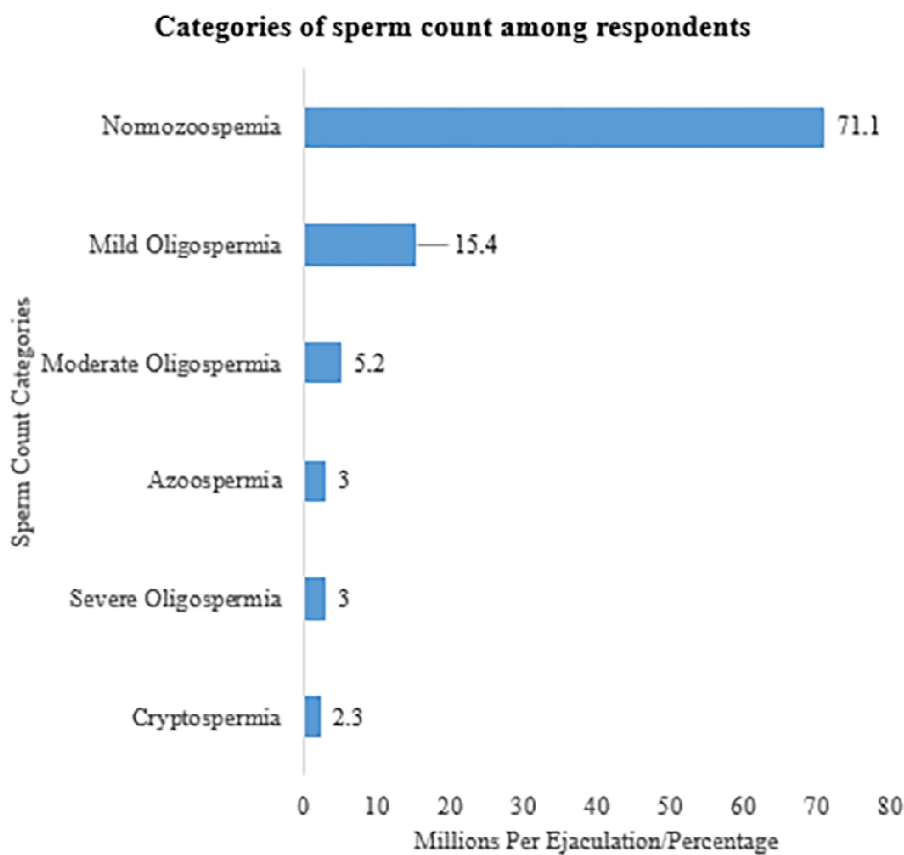

**Figure 1: Categories of sperm count of male patients attending fertility centers in Osogbo, Osun State**

228

229 **Figure 1: Categories of sperm count of male patients attending fertility centers in**

230 **Osogbo, Osun State**

231

232

233

234

235

236

237

238 **Table 1: Seminal fluid analysis of male patients attending fertility centers in Osogbo,**

239 **Osun State**

| <b>Variables</b>               | <b>Frequency (n=305)</b> | <b>Percentage</b> |
|--------------------------------|--------------------------|-------------------|
| <b>Sperm Count</b>             |                          |                   |
| Abnormal (>32 million)         | 88                       | 28.9              |
| Normal (<32 million)           | 217                      | 71.1              |
| <b>Progressive Motility</b>    |                          |                   |
| Normal (> 32%)                 | 101                      | 33.1              |
| Abnormal/Athenospermia (<32%)  | 204                      | 69.9              |
| <b>Morphology</b>              |                          |                   |
| Normal (>4%)                   | 110                      | 36.1              |
| Abnormal/Teratopsermia (<4%)   | 195                      | 63.9              |
| <b>Culture of any organism</b> |                          |                   |
| No                             | 305                      | 100.0             |

240

241

242

243

244

245

246

247

248

249

250 **Table 2: Sociodemographic characteristics of participants in the Key informant interview**

| Code | Age range (yrs) | Gen der | Marital Status | Ethnicity | Religion  | Edu. Status | Particip ant Type | Years of Working Experien ce |
|------|-----------------|---------|----------------|-----------|-----------|-------------|-------------------|------------------------------|
| N1   | 36-40           | F       | Married        | Yoruba    | Muslim    | SSCE        | Wife              | NA                           |
| N2   | 36-40           | M       | Married        | Yoruba    | Christian | Tertiary    | Doctor            | 10                           |
| N3   | 31-35           | F       | Married        | Yoruba    | Christian | HND         | Nurse             | 5                            |
| N4   | 41-45           | F       | Married        | Yoruba    | Muslim    | Tertiary    | Nurse             | 13                           |
| N5   | 25-30           | F       | Single         | Nupe      | Christian | Tertiary    | Doctor            | 1                            |
| N6   | 36-40           | F       | Married        | Yoruba    | Christian | Tertiary    | Nurse             | 10                           |
| N7   | 25-30           | M       | Single         | Yoruba    | Christian | Tertiary    | Doctor            | 3                            |
| N8   | 31-35           | F       | Married        | Yoruba    | Muslim    | NS          | Wife              | NA                           |
| N9   | 41-45           | F       | Married        | Yoruba    | Christian | Tertiary    | Wife              | NA                           |
| N10  | 36-40           | M       | Single         | Yoruba    | Muslim    | Tertiary    | Doctor            | 5                            |

251 M: Male, F: Female

## 252 Ethical approval and consent to participate

253 Ethical approvals for this study were obtained from the Ethics and Research Committee of

254 Uniosun Teaching Hospital. The Protocol number UTH/EC/2024/06/957. All ethical

255 principles guiding the conduct of research such as informed consent, beneficence, non-  
256 maleficence, confidentiality, justice, autonomy etc were strictly taken into consideration. All  
257 information gathered were confidential and privacy and confidentiality of the respondents  
258 were guaranteed. All respondents were made to sign the informed consent before filling the  
259 questionnaire.

260

261

262

263

264

### Categorization of signs and symptoms in epidemiology

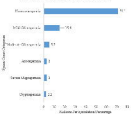

Figure 1: Categorization of signs and symptoms among participants in the study. Source: Study Data.
